# Supplementary material
Source: publisher site journal article supplement (https://www.dovepress.com/article/352480)
Supplement: Supplementary file 1 [file get_supplementary_file.php]

**Supplementary information**

**Postoperative adjuvant transarterial chemoembolization plus tyrosine kinase inhibitor for hepatocellular carcinoma**

***a multicentre retrospective study***

Contents

[Table S1: Uni- and multivariate Cox regression analysis of risk factors of DFS in the primary cohort. 2](#_Toc93694036)

[Table S2: Uni- and multivariate Cox regression analysis of risk factors of DFS in the PSM cohort. 3](#_Toc93694037)

[Table S3: Uni- and multivariate Cox regression analysis of risk factors of DFS in the IPW cohort. 4](#_Toc93694038)

[Table S4: Uni- and multivariate Cox regression analysis of risk factors of DFS with additional adjustment for propensity score from primary cohort. 5](#_Toc93694039)

[FigureS1. Selection of the study population. 6](#_Toc93694040)

[FigureS2. Disease-free survival according to various TKI agents. 7](#_Toc93694041)

[FigureS3. Disease-free survival according to tumor characteristics (A) Tumor diameter smaller than 5cm; (B) Tumor diameter larger than or equal to 5cm; (C) Tumor number less than 3; (D) Tumor number more than or equal to 3; (E) MVI: M1; (F) MVI: M2; (G) PVTT negative; (H) PVTT positive; (I) HVTT negative; (J) HVTT positive; (K) BDTT negative; (L) BDTT positive; (M) Rupture negative; (N) Rupture positive; (O) TNM II; (P) TNM IIIA; (Q) TNM IIIB. 8](#_Toc93694042)

# Table S1: Uni- and multivariate Cox regression analysis of risk factors of DFS in the primary cohort.

| **Characteristics** | **Univariate** | | **Multivariate** | |
| --- | --- | --- | --- | --- |
| **HR (95%CI)** | **P-value** | **HR (95%CI)** | **P-value** |
| **Age**, years | 0.996(0.983-1.01) | 0.59 |  |  |
| **Gender**, Female vs Male | 0.748(0.462-1.21) | 0.237 |  |  |
| **HBsAg**, Positive vs Negative | 1.966(1.002-3.857) | **0.049** | 1.761(0.89-3.482) | 0.104 |
| **Liver cirrhosis**, Present vs Absent | 1.046(0.737-1.486) | 0.801 |  |  |
| **Platelets**, 109/L | 1.000(0.998-1.002) | 0.954 |  |  |
| **Total bilirubin**, umol/L | 0.998(0.995-1.002) | 0.389 |  |  |
| **Albumin**, g/L | 0.984(0.953-1.016) | 0.337 |  |  |
| **ALT**, U/L | 0.999(0.996-1.002) | 0.504 |  |  |
| **AST**, U/L | 1.002(0.999-1.006) | 0.161 | 1.000(0.996-1.003) | 0.897 |
| **GGT**, U/L | 1.000(0.999-1.001) | 0.451 |  |  |
| **AFP, ng/ml**, ≥400 vs <400 | 1.123(0.816-1.546) | 0.476 |  |  |
| **Intraoperative blood loss**, ml, ≥800 vs <800 | 1.345(0.761-2.376) | 0.308 |  |  |
| **Intraoperative transfusion**, Yes vs No | 1.178(0.81-1.713) | 0.391 |  |  |
| **Anatomic hepatectomy**, Yes vs No | 1.307(0.942-1.813) | 0.108 | 0.782(0.500-1.223) | 0.281 |
| **Major hepatectomy**, Major vs Minor | 1.745(1.253-2.431) | **0.001** | 1.615(1.004-2.597) | **0.048** |
| **Tumor number**, ≥3 vs <3 | 1.305(0.865-1.968) | 0.204 |  |  |
| **Tumor diameter**, cm | 1.067(1.028-1.108) | **0.001** | 1.057(1.012-1.103) | **0.012** |
| **MVI**, M2 vs M1/M0 | 1.168(0.841-1.623) | 0.353 |  |  |
| **Capsule** |  |  |  |  |
| None | ref | ref |  |  |
| Incomplete | 0.878(0.6210-1.241) | 0.461 |  |  |
| Complete | 0.801(0.475-1.352) | 0.407 |  |  |
| **Satellite nodules**, Present vs Absent | 1.288(0.936-1.773) | 0.12 | 1.14(0.821-1.582) | 0.434 |
| **Rupture**, Yes vs No | 0.627(0.320-1.230) | 0.174 | 1.197(0.571-2.507) | 0.634 |
| **PVTT**, Yes vs No | 1.641(1.191-2.263) | **0.002** | 1.509(1.067-2.134) | **0.02** |
| **HVTT**, Yes vs No | 0.804(0.376-1.717) | 0.573 |  |  |
| **BDTT**, Yes vs No | 0.741(0.441-1.245) | 0.257 |  |  |
| **Treatment**, TACE + TKI vs TACE | 0.605(0.416-0.880) | **0.009** | 0.611(0.408-0.915) | **0.017** |

Abbreviations: HBsAg, Hepatitis B virus surface antigen; ALT: alanine aminotransferase; AST, aspartate aminotransferase; GGT, gamma-glutamyl transpeptidase; AFP, alpha fetoprotein; MVI, microvascular invasion; PVTT, portal vein tumor thrombus; HVTT, hepatic vein tumor thrombus; BDTT, bile duct tumor thrombus; AJCC, American Joint Committee on Cancer; TACE, transcatheter arterial chemoembolization; TKI, Tyrosine Kinase Inhibitor; HR, hazard ratio; CI, confidence interval; DFS, disease-free survival.

Note: the bold P-value means P<0.05.

# Table S2: Uni- and multivariate Cox regression analysis of risk factors of DFS in the PSM cohort.

| **Characteristics** | **Univariate** | | **Multivariate** | |
| --- | --- | --- | --- | --- |
| **HR (95%CI)** | **P-value** | **HR (95%CI)** | **P-value** |
| **Age**, years | 0.979(0.959-0.999) | **0.037** | 0.986(0.964-1.009) | 0.22 |
| **Gender**, Female vs Male | 0.745(0.408-1.357) | 0.336 |  |  |
| **HBsAg**, Positive vs Negative | 1.589(0.640-3.943) | 0.318 |  |  |
| **Liver cirrhosis**, Present vs Absent | 0.709(0.435-1.156) | 0.168 | 0.812(0.435-1.518) | 0.514 |
| **Platelets**, 109/L | 1.001(0.999-1.003) | 0.505 |  |  |
| **Total bilirubin**, umol/L | 0.990(0.970-1.010) | 0.326 |  |  |
| **Albumin**, g/L | 0.983(0.932-1.036) | 0.516 |  |  |
| **ALT**, U/L | 0.999(0.994-1.003) | 0.525 |  |  |
| **AST**, U/L | 1.001(0.997-1.005) | 0.709 |  |  |
| **GGT**, U/L | 1.000(0.998-1.002) | 0.990 |  |  |
| **AFP, ng/ml**, ≥400 vs <400 | 0.905(0.568-1.442) | 0.674 |  |  |
| **Intraoperative blood loss**, ml, ≥800 vs <800 | 1.675(0.673-4.170) | 0.268 |  |  |
| **Intraoperative transfusion**, Yes vs No | 1.306(0.687-2.482) | 0.416 |  |  |
| **Anatomic hepatectomy**, Yes vs No | 1.157(0.719-1.862) | 0.549 |  |  |
| **Major hepatectomy**, Major vs Minor | 1.927(1.202-3.090) | **0.006** | 1.806(1.066-3.061) | **0.028** |
| **Tumor number**, ≥3 vs <3 | 1.161(0.638-2.115) | 0.625 |  |  |
| **Tumor diameter**, cm | 1.061(1.01-1.115) | **0.019** | 1.021(0.956-1.090) | 0.533 |
| **MVI**, M2 vs M1/M0 | 1.400(0.880-2.229) | 0.156 | 1.114(0.663-1.871) | 0.684 |
| **Capsule** |  |  |  |  |
| None | ref | ref |  |  |
| Incomplete | 0.873(0.527-1.447) | 0.599 |  |  |
| Complete | 0.977(0.492-1.939) | 0.946 |  |  |
| **Satellite nodules**, Present vs Absent | 1.210(0.766-1.911) | 0.413 |  |  |
| **Rupture**, Yes vs No | 0.932(0.375-2.312) | 0.878 |  |  |
| **PVTT**, Yes vs No | 1.238(0.780-1.964) | 0.365 |  |  |
| **HVTT**, Yes vs No | 1.079(0.340-3.429) | 0.897 |  |  |
| **BDTT**, Yes vs No | 0.458(0.184-1.138) | 0.093 | 0.462(0.175-1.220) | 0.119 |
| **Treatment**, TACE + TKI vs TACE | 0.548(0.345-0.871) | **0.011** | 0.503(0.306-0.826) | **0.007** |

Abbreviations: PSM, propensity score matching; HBsAg, Hepatitis B virus surface antigen; ALT: alanine aminotransferase; AST, aspartate aminotransferase; GGT, gamma-glutamyl transpeptidase; AFP, alpha fetoprotein; MVI, microvascular invasion; PVTT, portal vein tumor thrombus; HVTT, hepatic vein tumor thrombus; BDTT, bile duct tumor thrombus; AJCC, American Joint Committee on Cancer; TACE, transcatheter arterial chemoembolization; TKI, Tyrosine Kinase Inhibitor; HR, hazard ratio; CI, confidence interval; DFS, disease-free survival.

Note: the bold P-value means P<0.05.

# Table S3: Uni- and multivariate Cox regression analysis of risk factors of DFS in the IPW cohort.

| **Characteristics** | **Univariate** | | **Multivariate** | |
| --- | --- | --- | --- | --- |
| **HR (95%CI)** | **P-value** | **HR (95%CI)** | **P-value** |
| **Age**, years | 0.989(0.973-1.005) | 0.160 | 0.995(0.982-1.009) | 0.513 |
| **Gender**, Female vs Male | 0.516(0.256-1.042) | 0.065 | 0.804(0.494-1.307) | 0.378 |
| **HBsAg**, Positive vs Negative | 1.594(0.872-2.911) | 0.130 | 1.814(0.915-3.594) | 0.088 |
| **Liver cirrhosis**, Present vs Absent | 1.067(0.665-1.713) | 0.789 |  |  |
| **Platelets**, 109/L | 1.000(0.997-1.002) | 0.733 |  |  |
| **Total bilirubin**, umol/L | 0.994(0.984-1.003) | 0.188 | 0.999(0.995-1.004) | 0.783 |
| **Albumin**, g/L | 1.014(0.968-1.061) | 0.563 |  |  |
| **ALT**, U/L | 0.997(0.992-1.002) | 0.220 |  |  |
| **AST**, U/L | 0.997(0.991-1.004) | 0.458 |  |  |
| **GGT**, U/L | 0.999(0.998-1.001) | 0.315 |  |  |
| **AFP, ng/ml**, ≥400 vs <400 | 1.013(0.637-1.611) | 0.957 |  |  |
| **Intraoperative blood loss**, ml, ≥800 vs <800 | 0.810(0.239-2.746) | 0.735 |  |  |
| **Intraoperative transfusion**, Yes vs No | 0.898(0.416-1.940) | 0.785 |  |  |
| **Anatomic hepatectomy**, Yes vs No | 0.983(0.595-1.625) | 0.948 |  |  |
| **Major hepatectomy**, Major vs Minor | 1.210(0.705-2.079) | 0.489 |  |  |
| **Tumor number**, ≥3 vs <3 | 1.196(0.730-1.959) | 0.477 |  |  |
| **Tumor diameter**, cm | 1.021(0.947-1.102) | 0.588 |  |  |
| **MVI**, M2 vs M1/M0 | 1.216(0.780-1.895) | 0.388 |  |  |
| **Capsule** |  |  |  |  |
| None | ref | ref |  |  |
| Incomplete | 0.833(0.536-1.295) | 0.417 |  |  |
| Complete | 0.592(0.253-1.386) | 0.227 |  |  |
| **Satellite nodules**, Present vs Absent | 1.265(0.808-1.980) | 0.304 |  |  |
| **Rupture**, Yes vs No | 0.945(0.501-1.780) | 0.860 |  |  |
| **PVTT**, Yes vs No | 1.466(0.932-2.304) | 0.098 | 1.513(1.087-2.108) | **0.014** |
| **HVTT**, Yes vs No | 0.622(0.154-2.508) | 0.504 |  |  |
| **BDTT**, Yes vs No | 0.562(0.271-1.167) | 0.122 | 0.839(0.447-1.574) | 0.584 |
| **Treatment**, TACE + TKI vs TACE | 0.564(0.361-0.884) | **0.012** | 0.668(0.453-0.984) | **0.041** |

Abbreviations: IPW, inverse probability weights; HBsAg, Hepatitis B virus surface antigen; ALT: alanine aminotransferase; AST, aspartate aminotransferase; GGT, gamma-glutamyl transpeptidase; AFP, alpha fetoprotein; MVI, microvascular invasion; PVTT, portal vein tumor thrombus; HVTT, hepatic vein tumor thrombus; BDTT, bile duct tumor thrombus; AJCC, American Joint Committee on Cancer; TACE, transcatheter arterial chemoembolization; TKI, Tyrosine Kinase Inhibitor; HR, hazard ratio; CI, confidence interval; DFS, disease-free survival.

Note: the bold P-value means P<0.05.

# Table S4: Uni- and multivariate Cox regression analysis of risk factors of DFS with additional adjustment for propensity score from primary cohort.

| **Characteristics** | **Univariate** | | **Multivariate** | |
| --- | --- | --- | --- | --- |
| **HR (95%CI)** | **P-value** | **HR (95%CI)** | **P-value** |
| **Age**, years | 0.996(0.983-1.01) | 0.59 |  |  |
| **Gender**, Female vs Male | 0.748(0.462-1.21) | 0.237 |  |  |
| **HBsAg**, Positive vs Negative | 1.966(1.002-3.857) | **0.049** | 1.74(0.879-3.446) | 0.112 |
| **Liver cirrhosis**, Present vs Absent | 1.046(0.737-1.486) | 0.801 |  |  |
| **Platelets**, 109/L | 1.000(0.998-1.002) | 0.954 |  |  |
| **Total bilirubin**, umol/L | 0.998(0.995-1.002) | 0.389 |  |  |
| **Albumin**, g/L | 0.984(0.953-1.016) | 0.337 |  |  |
| **ALT**, U/L | 0.999(0.996-1.002) | 0.504 |  |  |
| **AST**, U/L | 1.002(0.999-1.006) | 0.161 | 1.000(0.996-1.004) | 0.966 |
| **GGT**, U/L | 1.000(0.999-1.001) | 0.451 |  |  |
| **AFP, ng/ml**, ≥400 vs <400 | 1.123(0.816-1.546) | 0.476 |  |  |
| **Intraoperative blood loss**, ml, ≥800 vs <800 | 1.345(0.761-2.376) | 0.308 |  |  |
| **Intraoperative transfusion**, Yes vs No | 1.178(0.81-1.713) | 0.391 |  |  |
| **Anatomic hepatectomy**, Yes vs No | 1.307(0.942-1.813) | 0.108 | 0.794(0.507-1.242) | 0.312 |
| **Major hepatectomy**, Major vs Minor | 1.745(1.253-2.431) | **0.001** | 1.615(1.003-2.599) | **0.049** |
| **Tumor number**, ≥3 vs <3 | 1.305(0.865-1.968) | 0.204 |  |  |
| **Tumor diameter**, cm | 1.067(1.028-1.108) | **0.001** | 1.056(1.011-1.103) | **0.014** |
| **MVI**, M2 vs M1/M0 | 1.168(0.841-1.623) | 0.353 |  |  |
| **Capsule** |  |  |  |  |
| None | ref | ref |  |  |
| Incomplete | 0.878(0.6210-1.241) | 0.461 |  |  |
| Complete | 0.801(0.475-1.352) | 0.407 |  |  |
| **Satellite nodules**, Present vs Absent | 1.288(0.936-1.773) | 0.12 | 1.159(0.833-1.612) | 0.38 |
| **Rupture**, Yes vs No | 0.627(0.320-1.230) | 0.174 | 0.884(0.317-2.467) | 0.814 |
| **PVTT**, Yes vs No | 1.641(1.191-2.263) | **0.002** | 1.617(1.101-2.375) | **0.014** |
| **HVTT**, Yes vs No | 0.804(0.376-1.717) | 0.573 |  |  |
| **BDTT**, Yes vs No | 0.741(0.441-1.245) | 0.257 |  |  |
| **Treatment**, TACE + TKI vs TACE | 0.605(0.416-0.880) | **0.009** | 0.597(0.397-0.897) | **0.013** |
| **Propensity score** | 0.448(0.173-1.163) | 0.099 | 2.003(0.395-10.164) | 0.402 |

Abbreviations: HBsAg, Hepatitis B virus surface antigen; ALT: alanine aminotransferase; AST, aspartate aminotransferase; GGT, gamma-glutamyl transpeptidase; AFP, alpha fetoprotein; MVI, microvascular invasion; PVTT, portal vein tumor thrombus; HVTT, hepatic vein tumor thrombus; BDTT, bile duct tumor thrombus; AJCC, American Joint Committee on Cancer; TACE, transcatheter arterial chemoembolization; TKI, Tyrosine Kinase Inhibitor; HR, hazard ratio; CI, confidence interval; DFS, disease-free survival.

Note: the bold P-value means P<0.05.

# Figure S1. Selection of the study population.


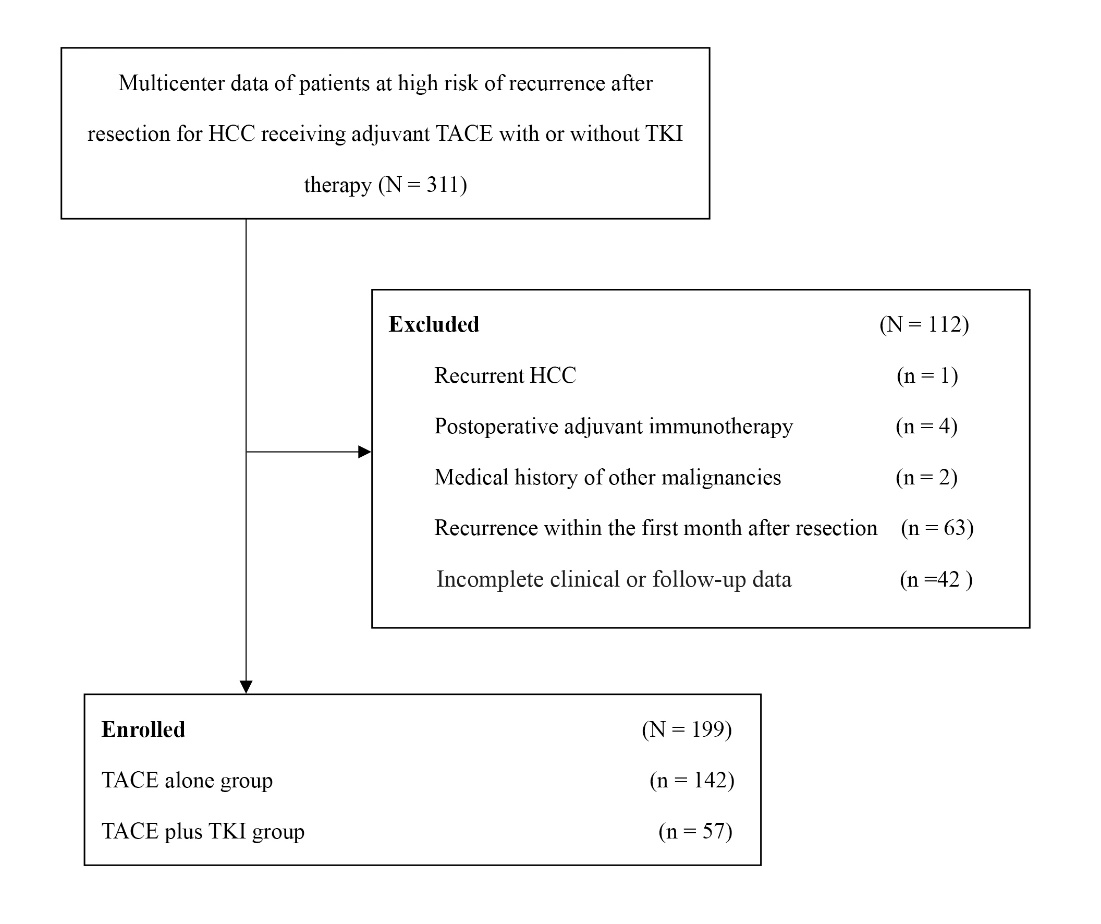


HCC, hepatocellular carcinoma.

# Figure S2. Disease-free survival according to various TKI agents.


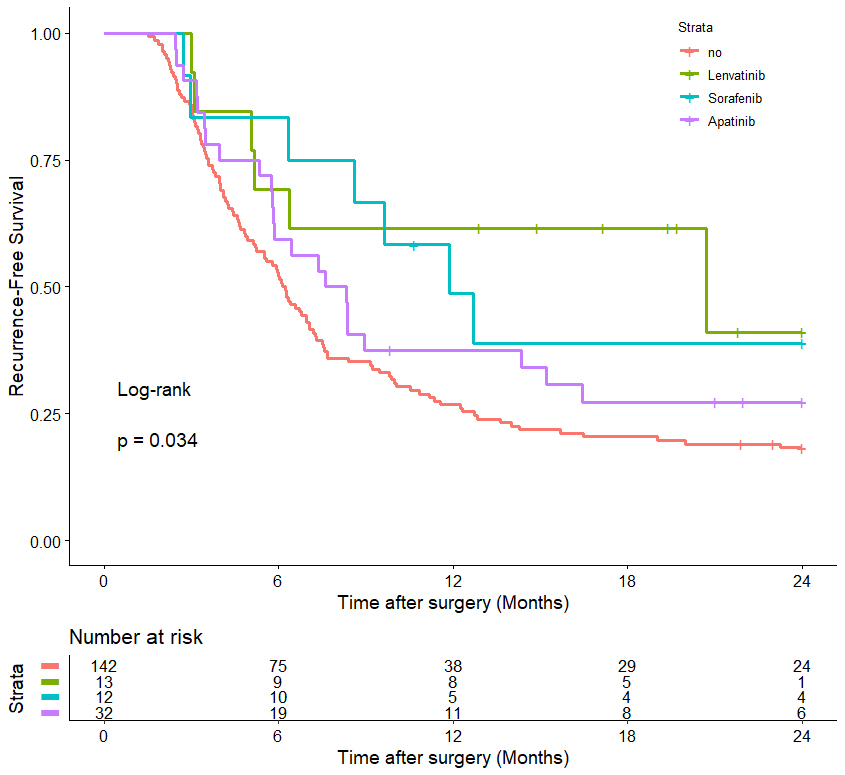


TKI, Tyrosine Kinase Inhibitor.

# FigureS3. Disease-free survival according to tumor characteristics (A) Tumor diameter smaller than 5cm; (B) Tumor diameter larger than or equal to 5cm; (C) Tumor number less than 3; (D) Tumor number more than or equal to 3; (E) MVI: M1; (F) MVI: M2; (G) PVTT negative; (H) PVTT positive; (I) HVTT negative; (J) HVTT positive; (K) BDTT negative; (L) BDTT positive; (M) Rupture negative; (N) Rupture positive; (O) TNM II; (P) TNM IIIA; (Q) TNM IIIB.


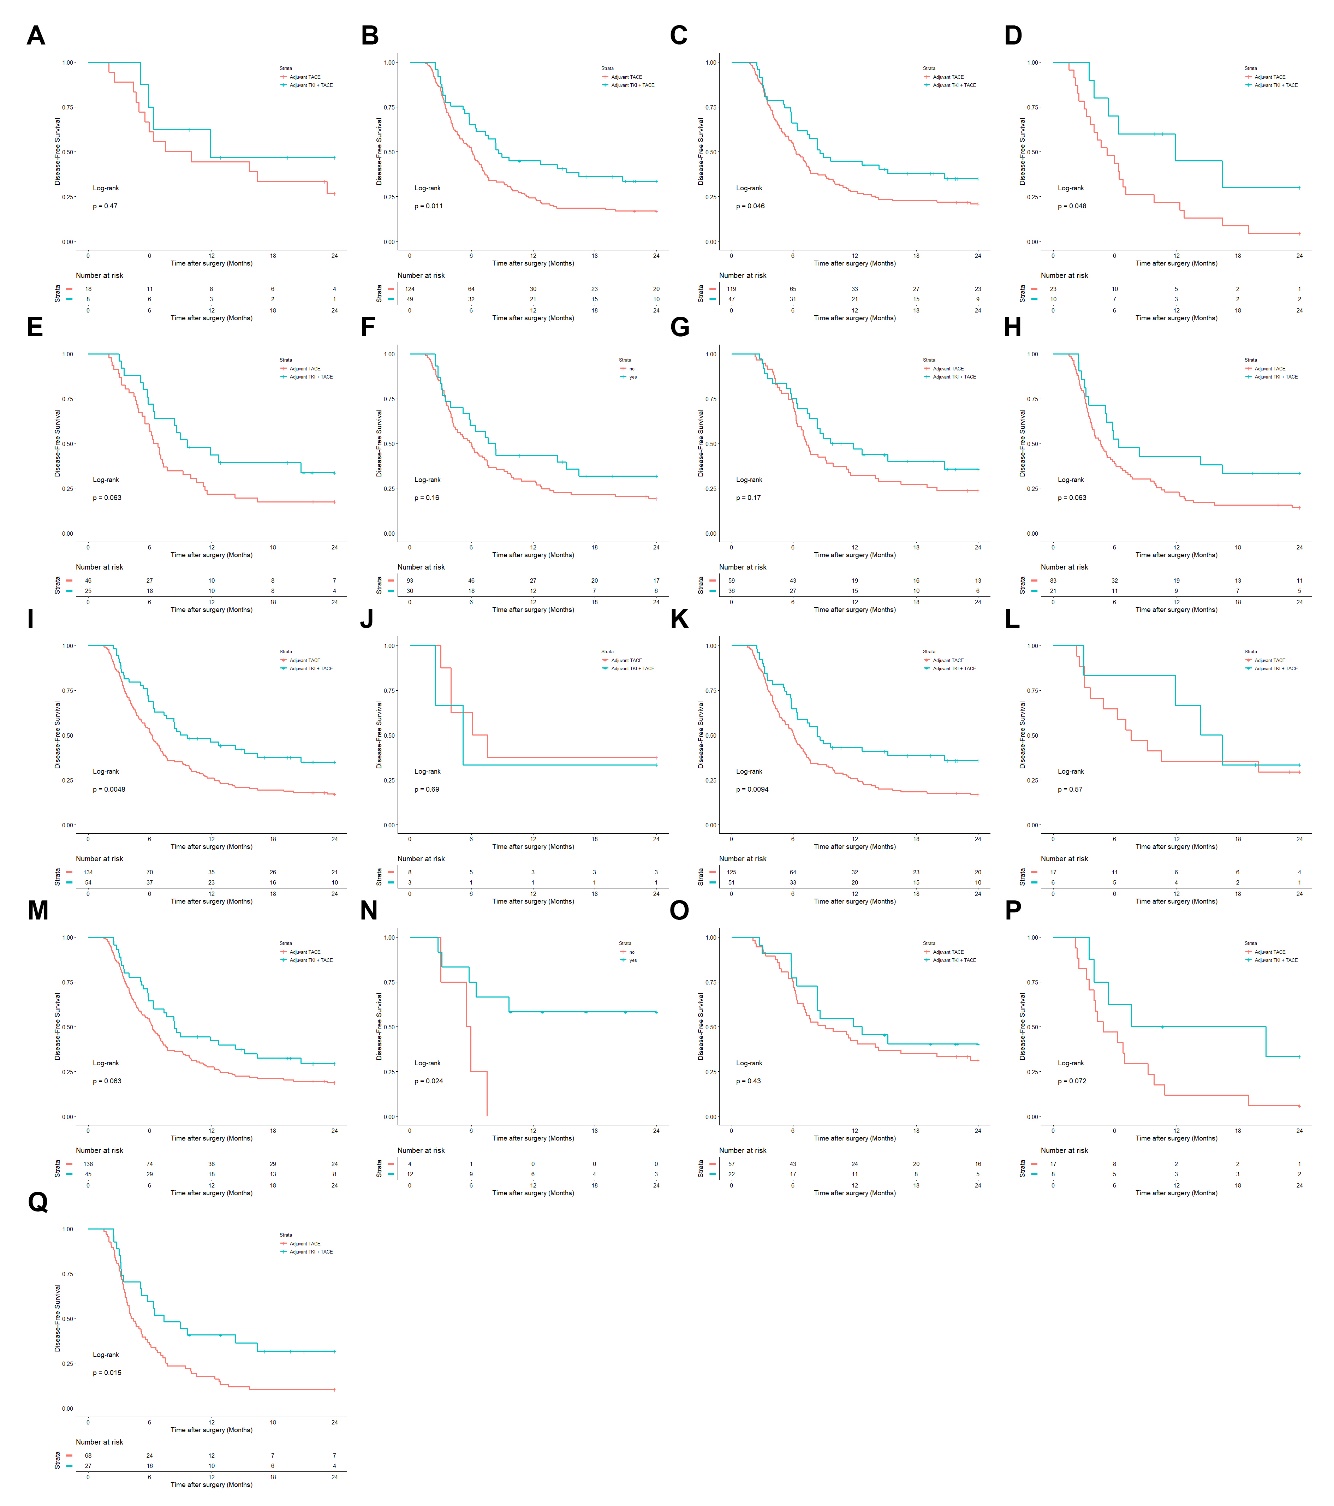


MVI, microvascular invasion; PVTT, portal vein tumor thrombus; HVTT, hepatic vein tumor thrombus; BDTT, bile duct tumor thrombus; AJCC, American Joint Committee on Cancer; TACE, transcatheter arterial chemoembolization; TKI, Tyrosine Kinase Inhibitor.
